# Supplementary material
Source: PubMed Central journal article supplement (PMC4846781)
Supplement: PSP4-5-201-s001.pdf [file PSP4-5-201-s001.pdf]

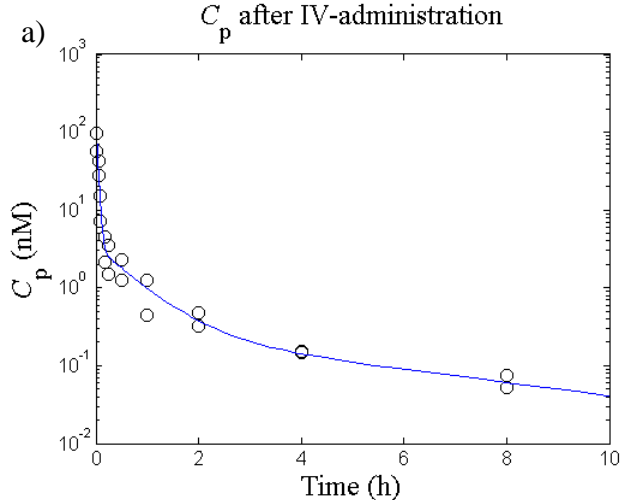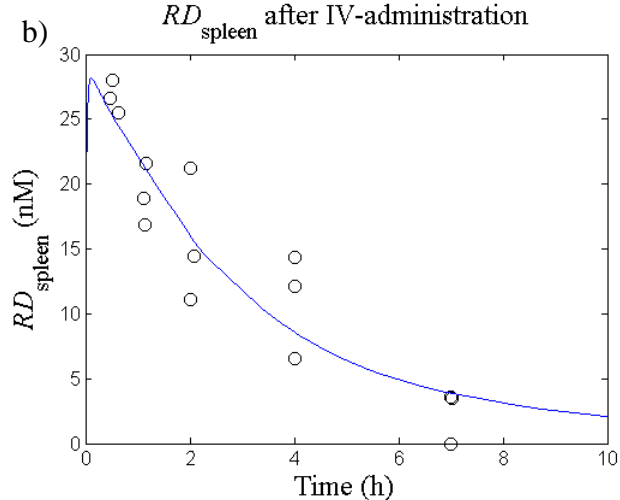

**Figure S1** a) Plasma concentration ( $C_p$ ) after intravenous (IV) administration of fluticasone propionate (FP) to rats (90 nmol/kg,  $n = 2$ ), and b) concentration of receptor-drug complex in the spleen ( $RD_{spleen}$ ) after IV-administration of FP (90 nmol/kg,  $n = 3$ /time point). Observed data are indicated by circles and the model fit by a solid line.
