# Supplementary material
Source: PubMed Central journal article supplement (PMC4846781)
Supplement: PSP4-5-201-s002.pdf [file PSP4-5-201-s002.pdf]

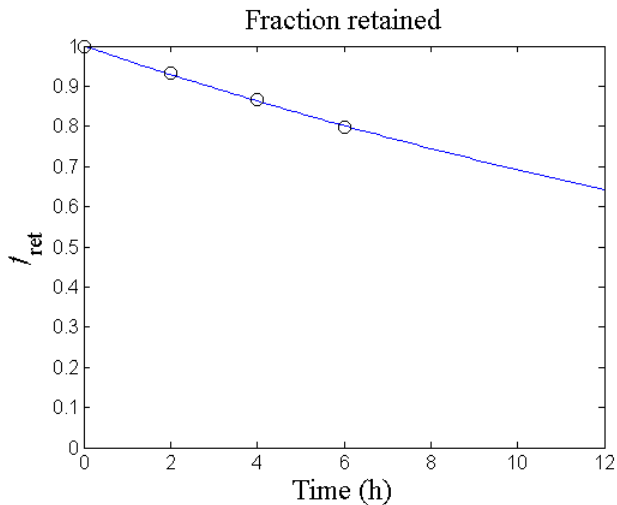

**Figure S2** A tracer was administered via inhalation in order to characterize the mucociliary clearance in rats. The retention of the tracer was governed by SPECT-imaging and data is presented as the fraction of tracer retained in the lung ( $f_{ret}$ ). Observations from <sup>6</sup> are indicated by circles and the model fit by a solid line.
