# Supplementary material
Source: PubMed Central journal article supplement (PMC4846781)
Supplement: PSP4-5-201-s003.pdf [file PSP4-5-201-s003.pdf]

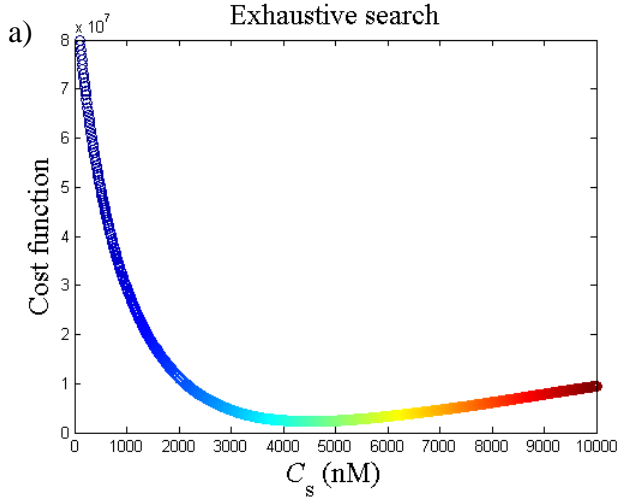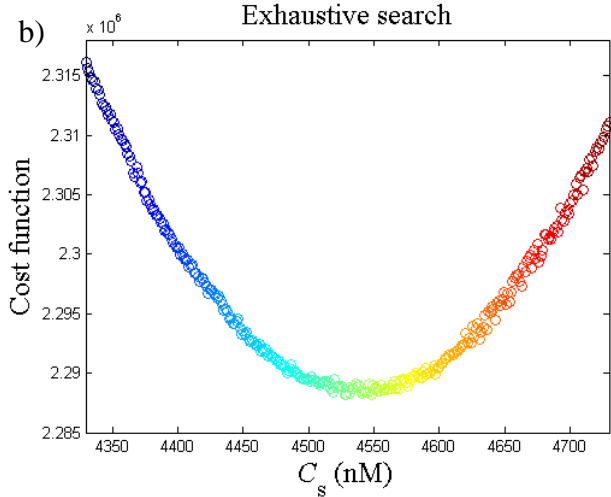

**Figure S3** An exhaustive search was performed to find an initial estimate of the solubility ( $C_s$ ). The cost function (sum of squares) was evaluated firstly using a) a broad search space ( $10^2 \leq C_s \leq 10^5$  nM), which was followed by b) a confined search space in the proximity to the best solution, obtained from the first exhaustive search.
