# Supplementary material
Source: PubMed Central journal article supplement (PMC4846781)
Supplement: PSP4-5-201-s007.pdf [file PSP4-5-201-s007.pdf]

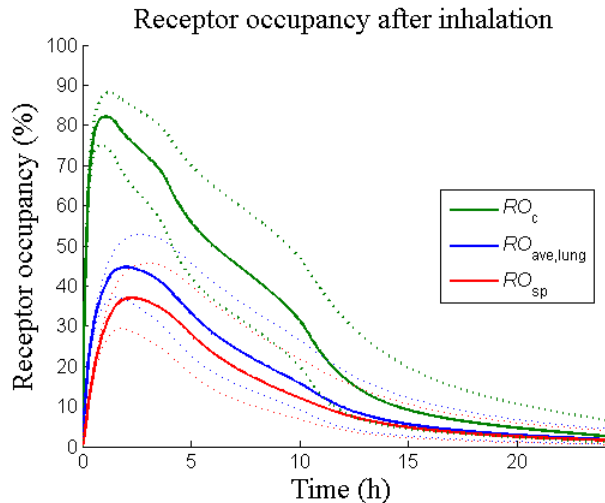

**Figure S7** Lung-selectivity after nose-only exposure of fluticasone propionate (FP, 11.3 nmol/kg) as illustrated by receptor occupancy in the central lung ( $RO_c$ , green line), the whole-lung ( $RO_{ave}$ , blue line) and the spleen ( $RO_{sp}$ , red line). For each receptor occupancy simulation, a 90% CI was created by a Monte Carlo simulation which repeatedly sampled random values from a lognormal distribution of the binding kinetics parameters ( $n = 1000$ , dotted lines).
